# Supplementary material for: Identification of allosteric inhibitors of the ecto-5'-nucleotidase (CD73) targeting the dimer interface
Source: PubMed Central journal article supplement (PMC5805337; doi:10.1371/journal.pcbi.1005943), 2018-01-29

# Copies of $^1\text{H}$ NMR and MS Spectra of RR compounds

## RR2 (MolPort-000-034-539)

NKTA B3977333

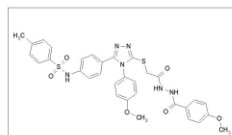

|                                                                              |           |
|------------------------------------------------------------------------------|-----------|
| RDV 0131405                                                                  |           |
| *3977333*                                                                    |           |
| C <sub>32</sub> H <sub>30</sub> N <sub>6</sub> O <sub>6</sub> S <sub>2</sub> | 658.7605  |
| BAS 3977333                                                                  | 0459217   |
| 07.10.2002                                                                   | Solv.DMSO |

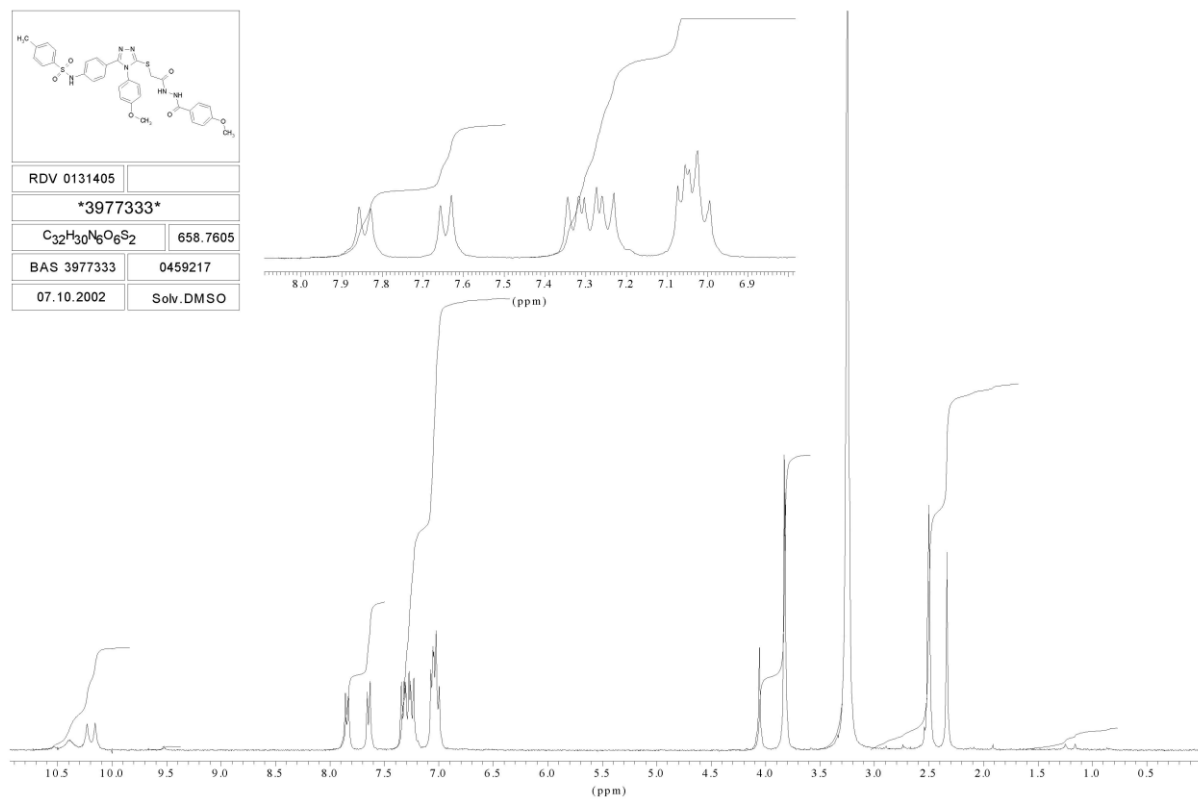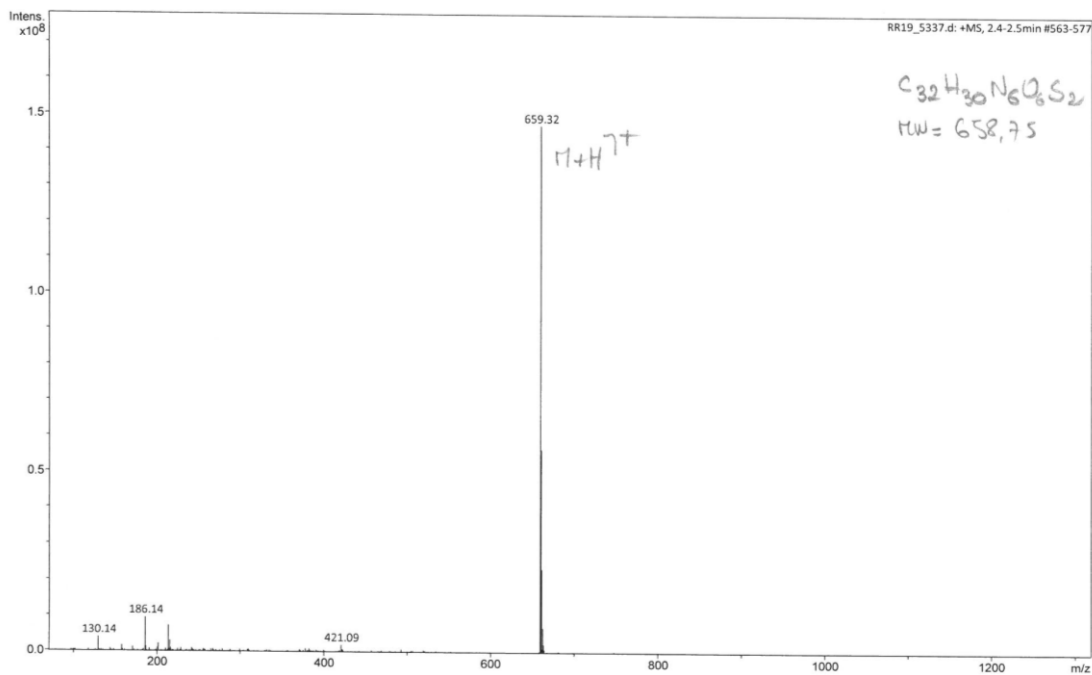

**RR3 (MolPort-001-732-635)**

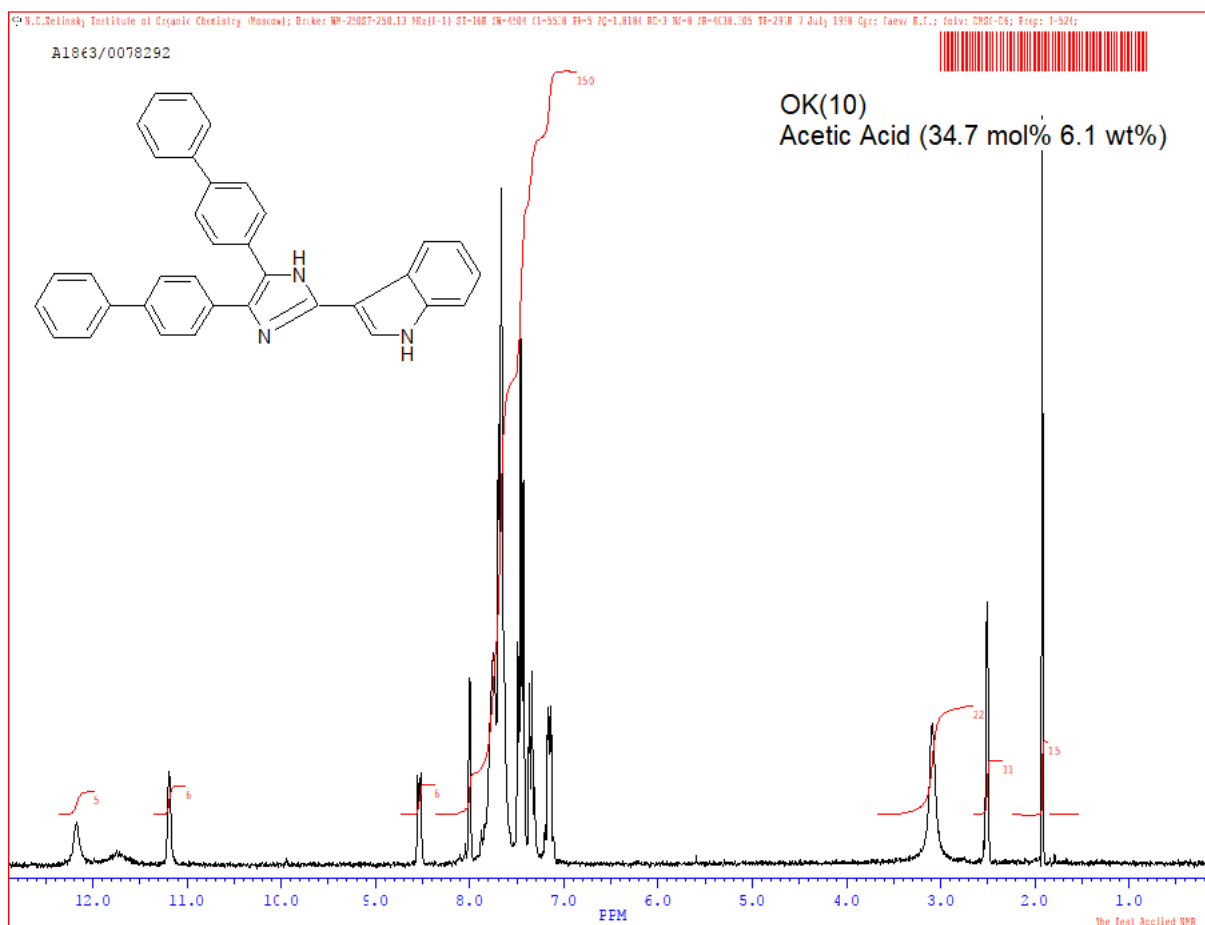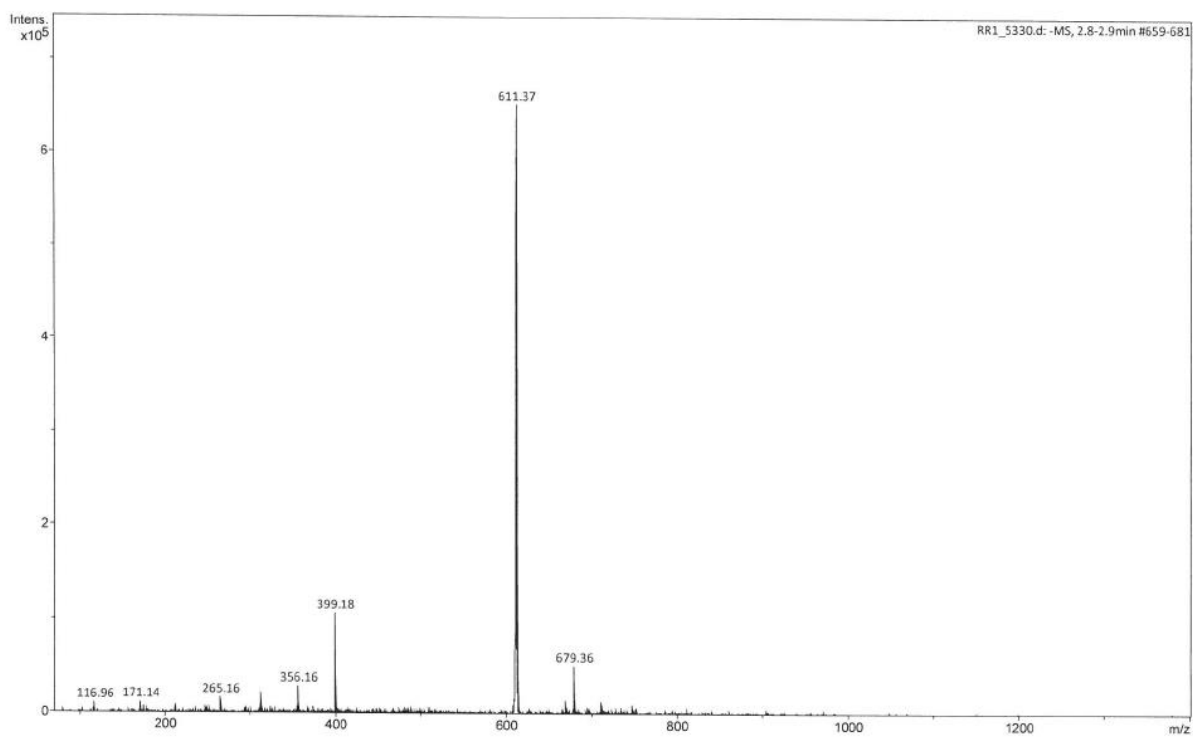

**RR4 (MolPort-000-007-519)**

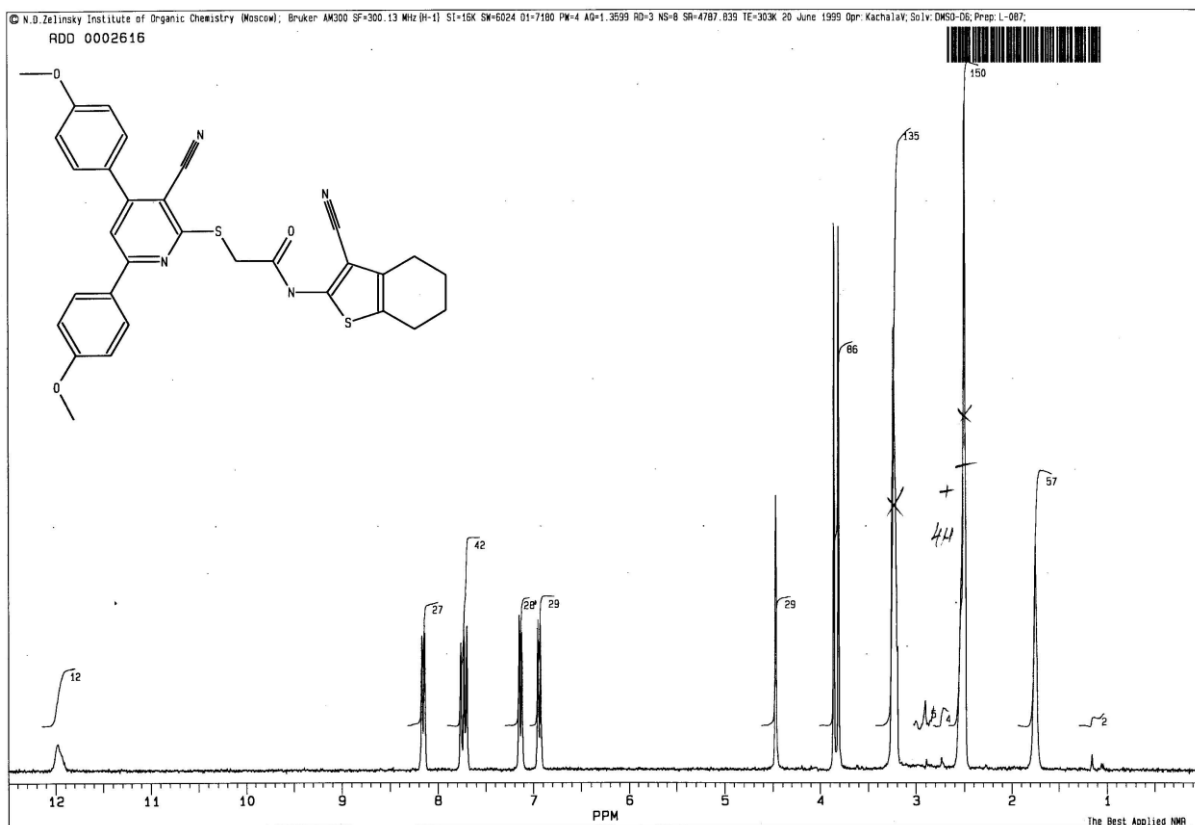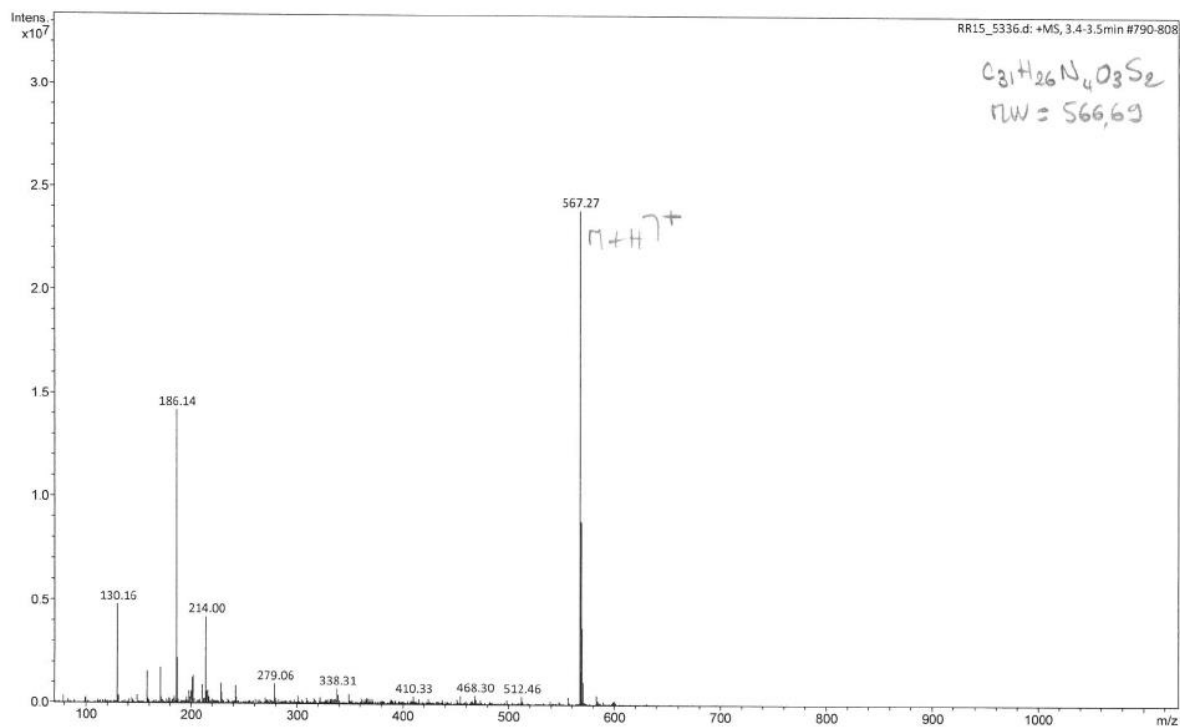

**RR6 (MolPort-000-006-845)**

das\_1029644

Sample Name: das\_1029644  
 Data Collected on: 400MR-vnmrs400  
 Archive directory: /home/chemp/vnmrsys/Asinex  
 Sample directory: sasha\_das\_1029644\_20171110\_01  
 FidFile: PROTON\_001

Pulse Sequence: PROTON (s2pul)  
 Solvent: dmsc  
 Data collected on: Nov 10 2017

Sample #32, Operator: sasha

Relax. delay 5.000 sec  
 Pulse 45.0 degrees  
 Acq. time 2.556 sec  
 Width 6410.3 Hz  
 32 repetitions  
 OBSERVE H1, 399.6346308 MHz  
 DATA PROCESSING  
 FT size 32768  
 Total time 4 min 3 sec

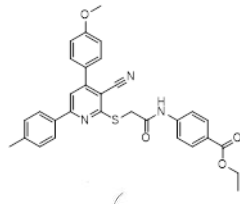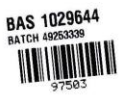

VARIAN

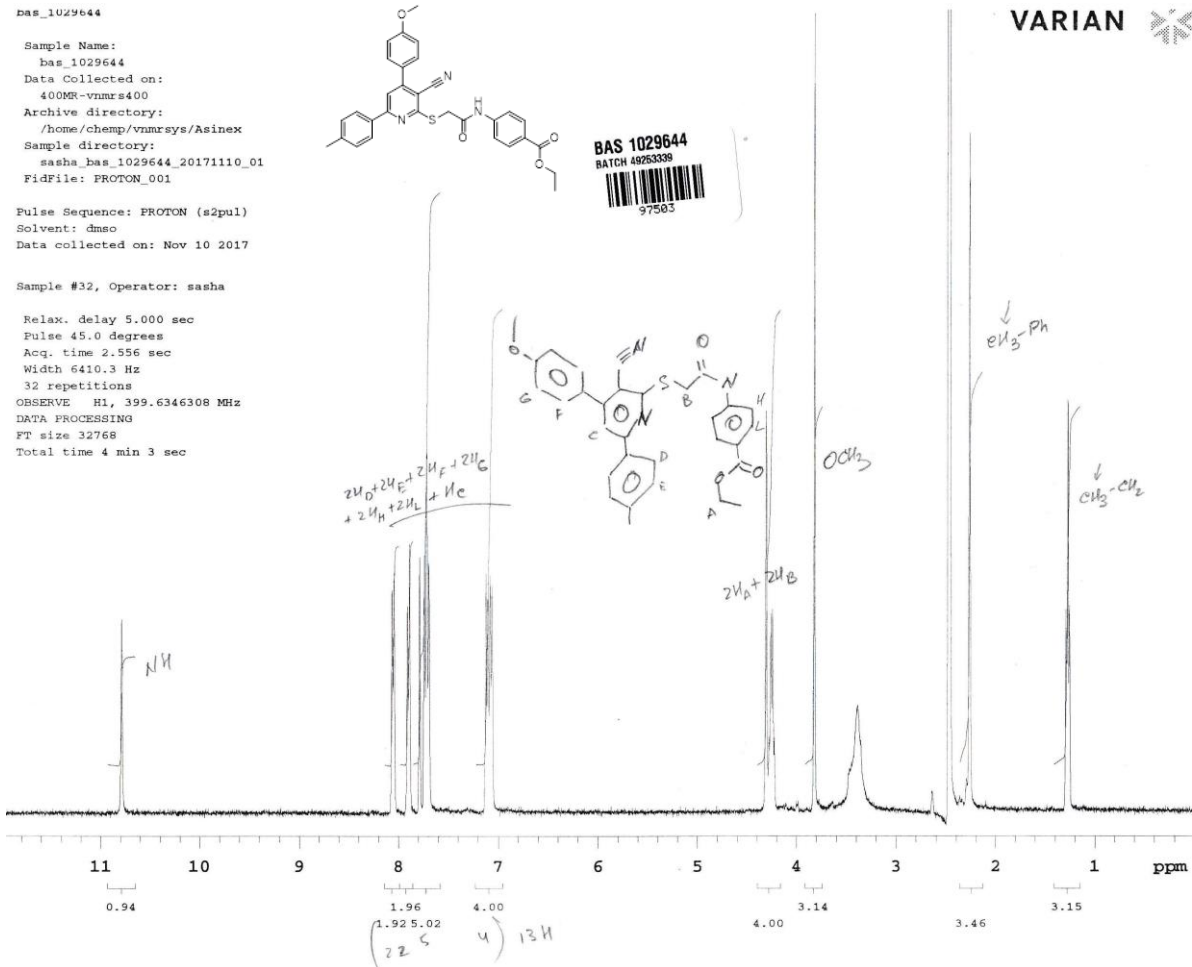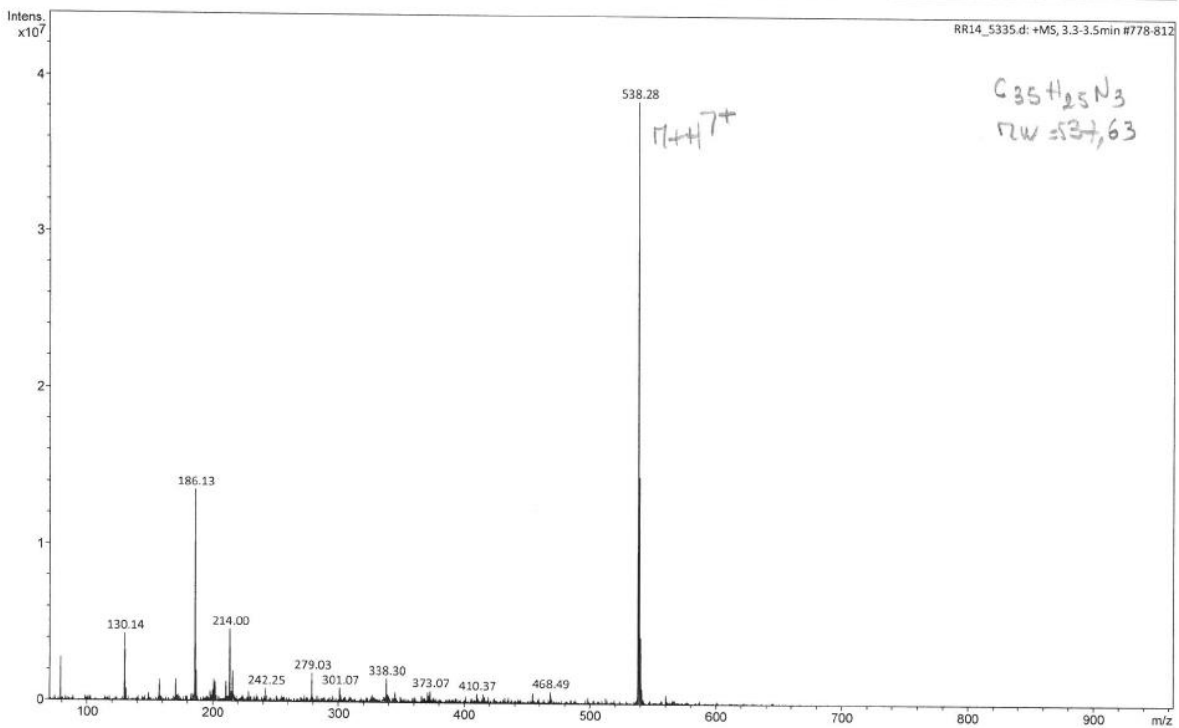

# RR8 (MolPort-002-696-968)

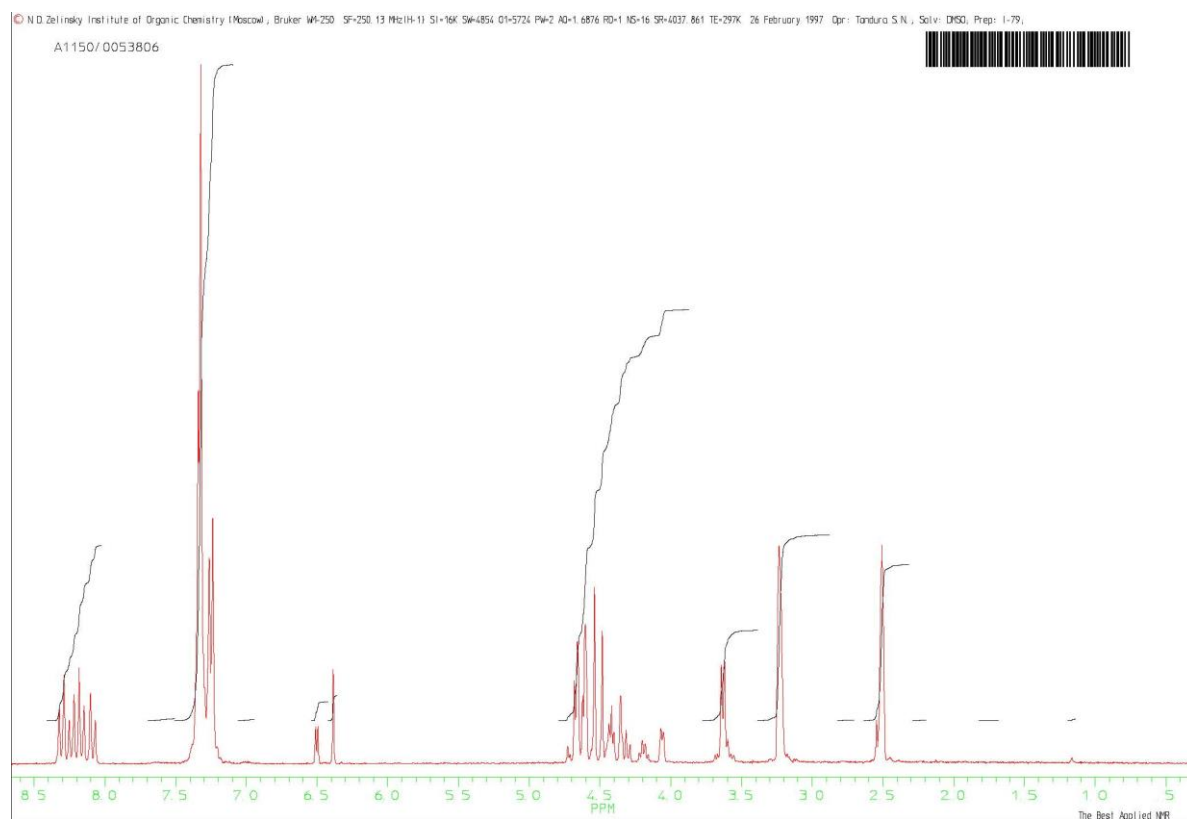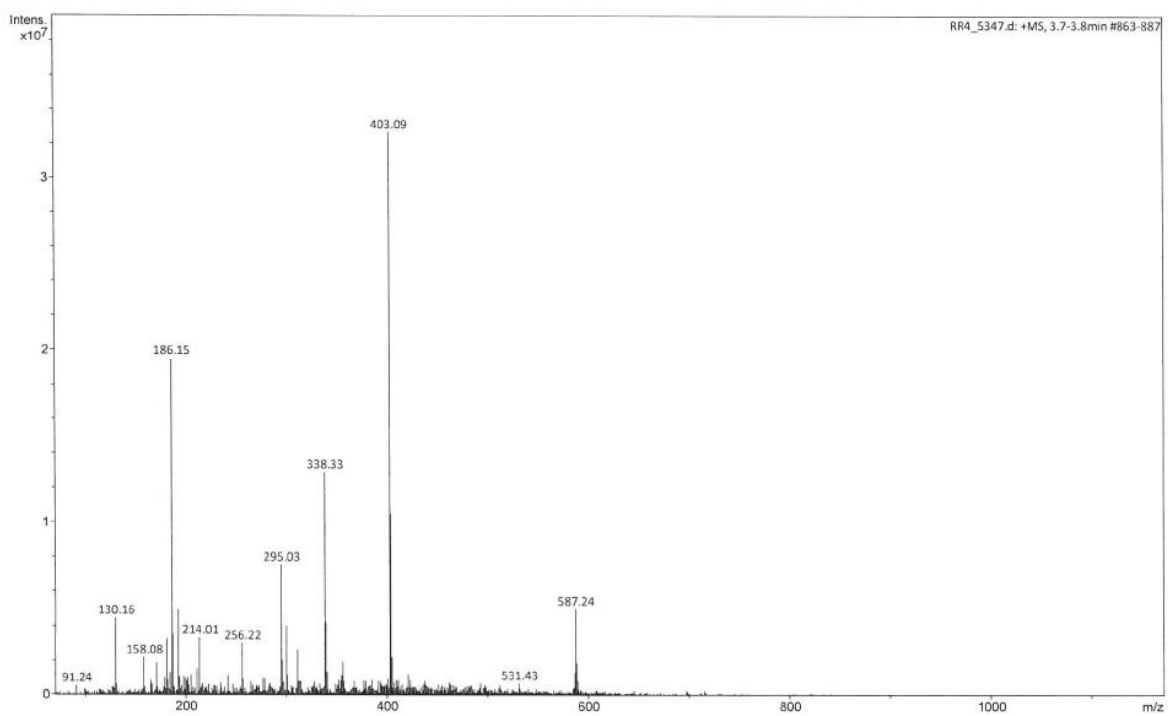

# RR9 (MolPort-008-326250)

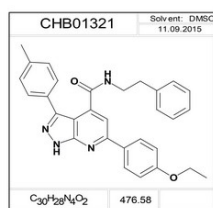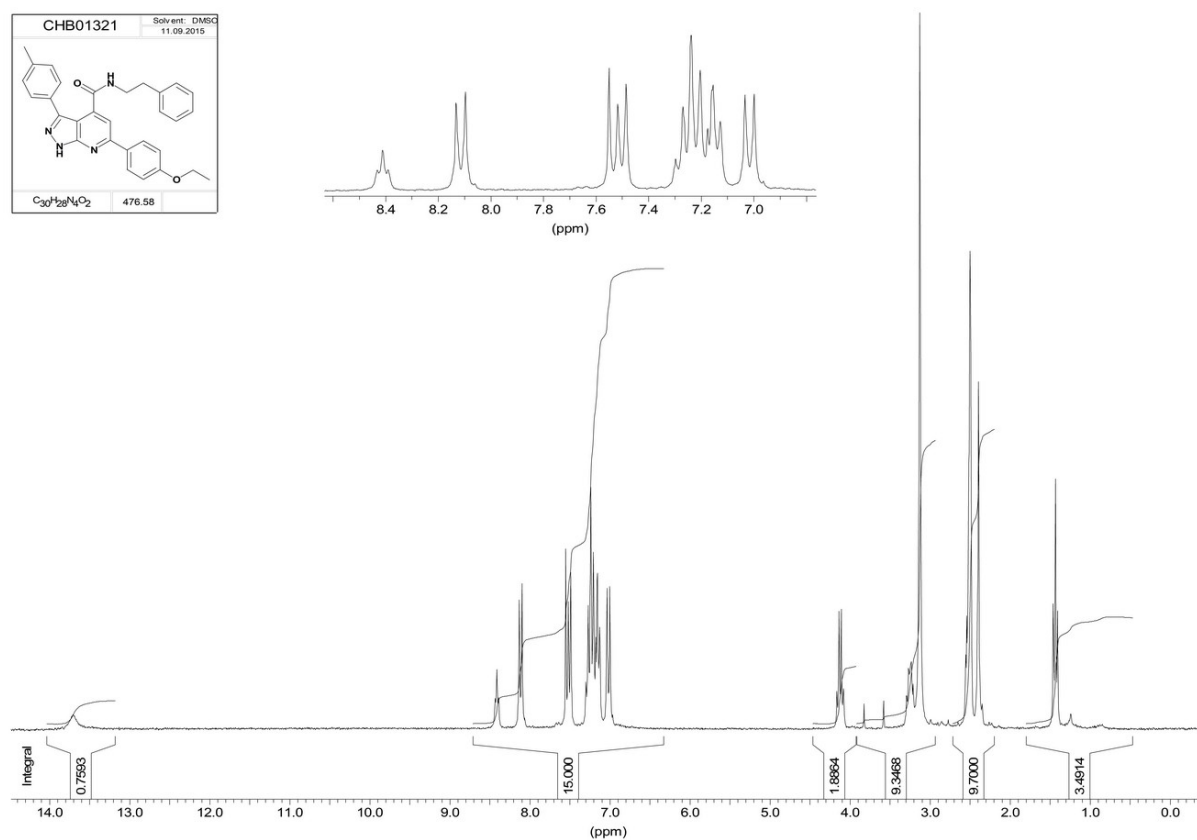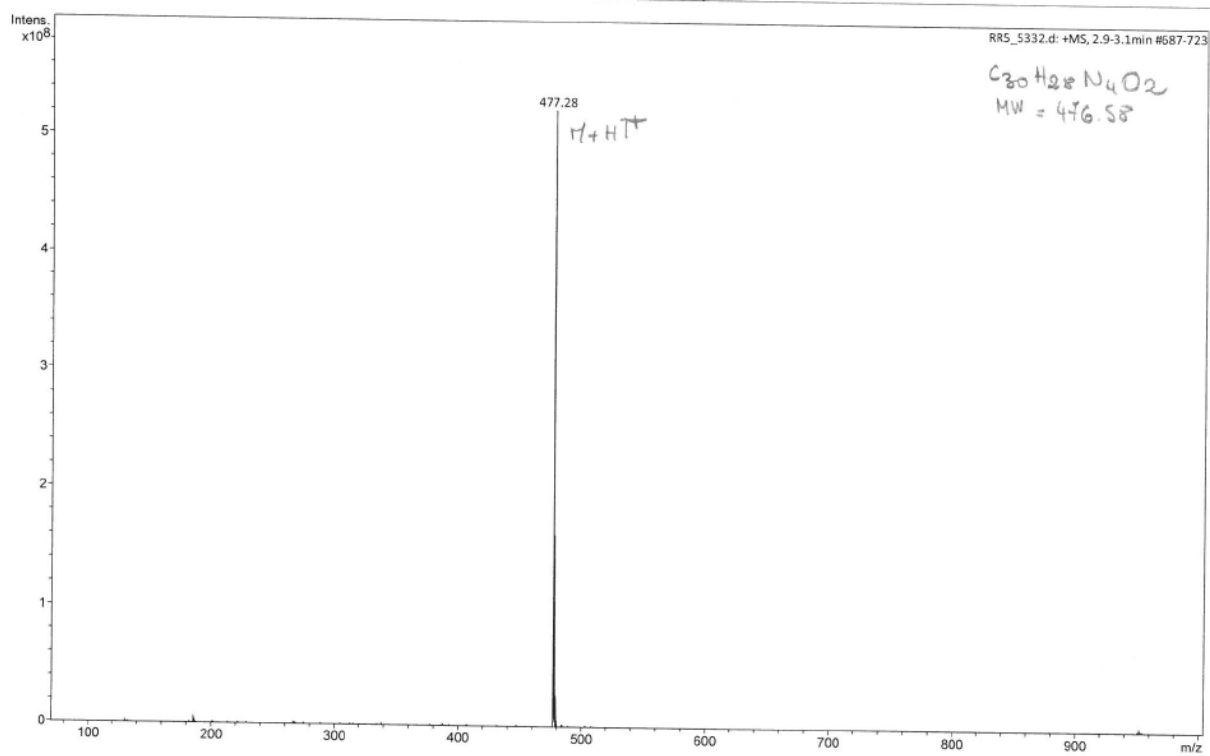

# RR11 (MolPort-001-991-763)

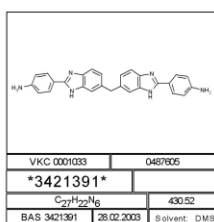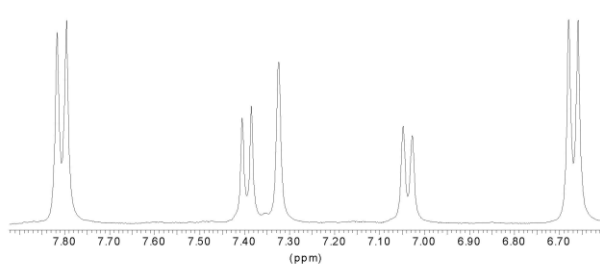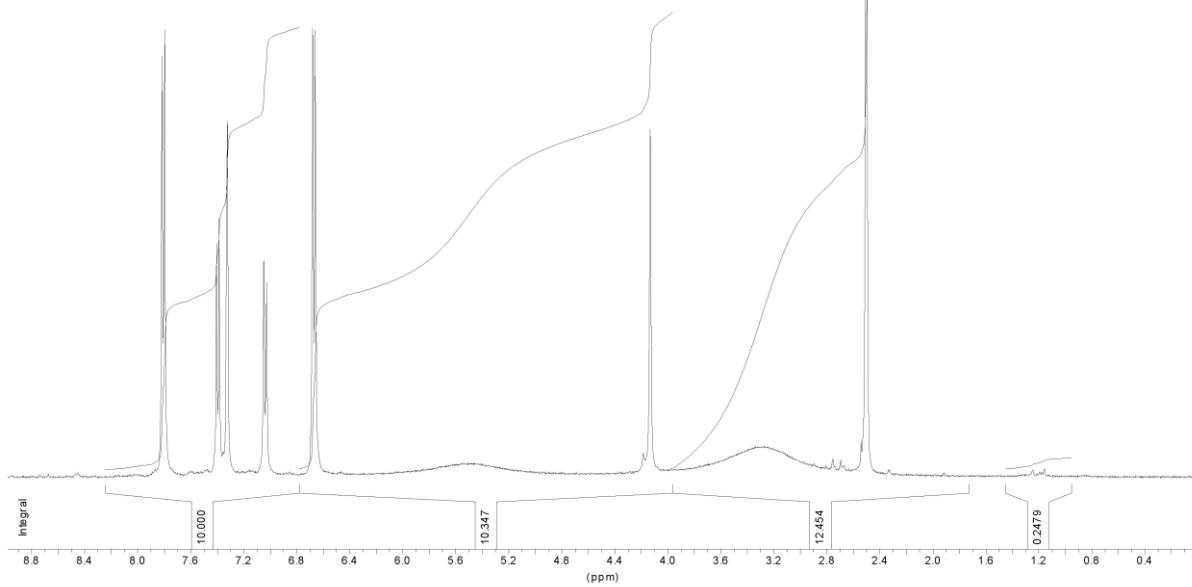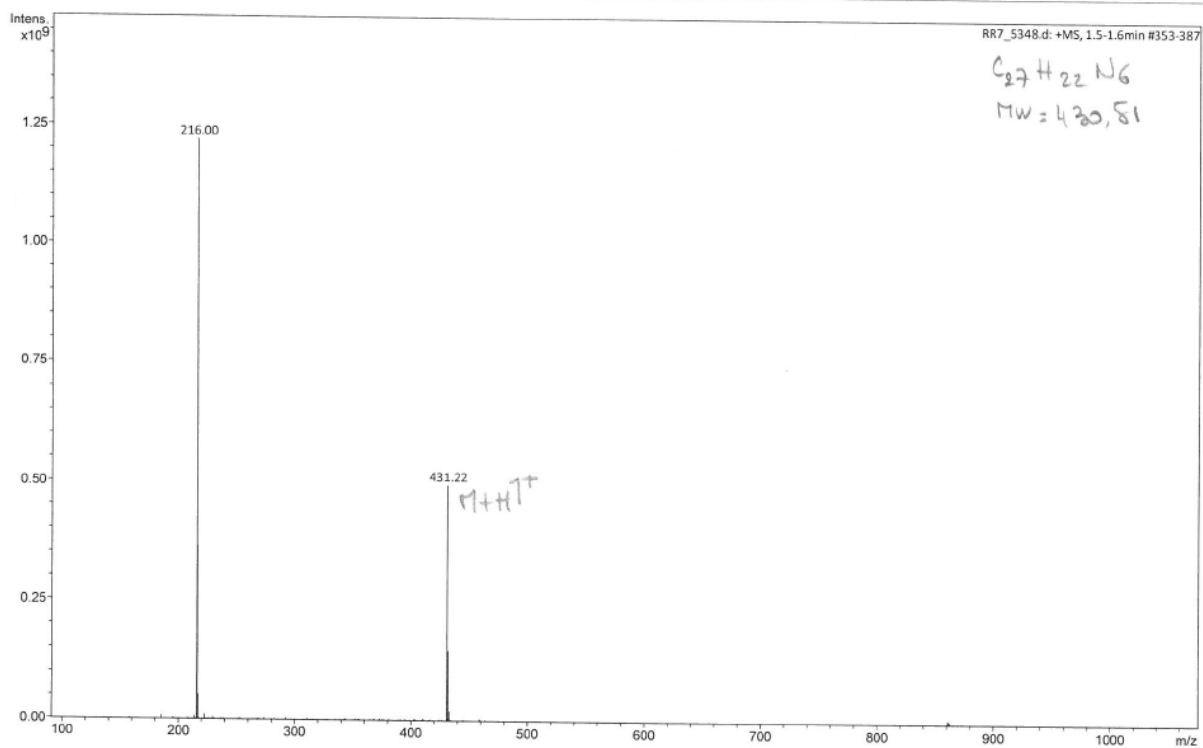

**RR16 (MolPort-000-103-196)**

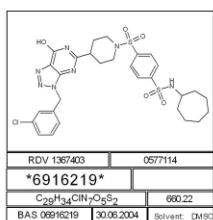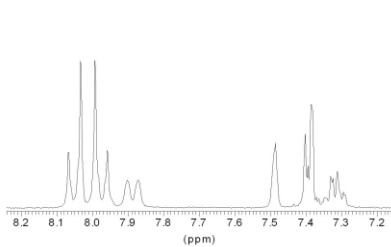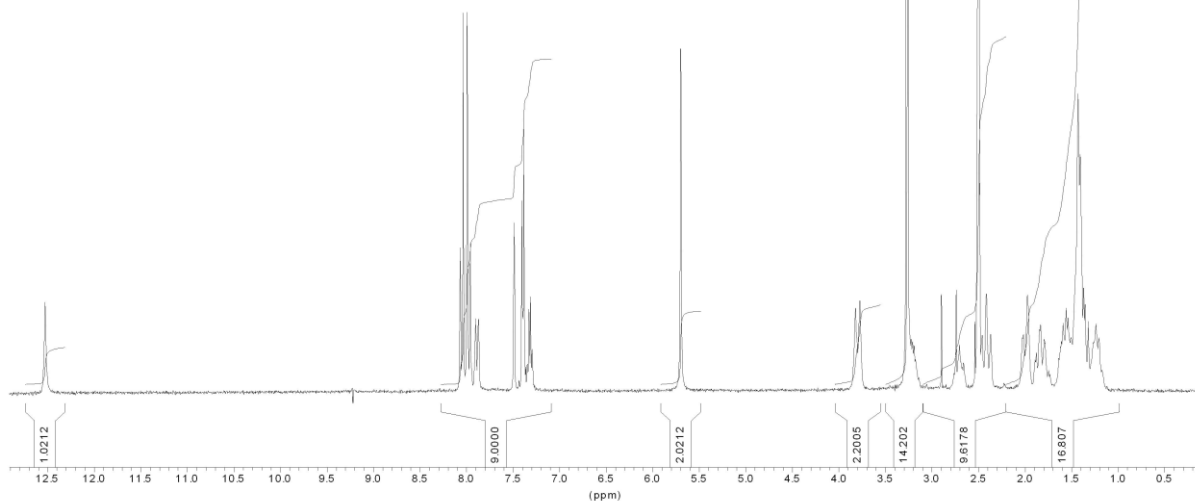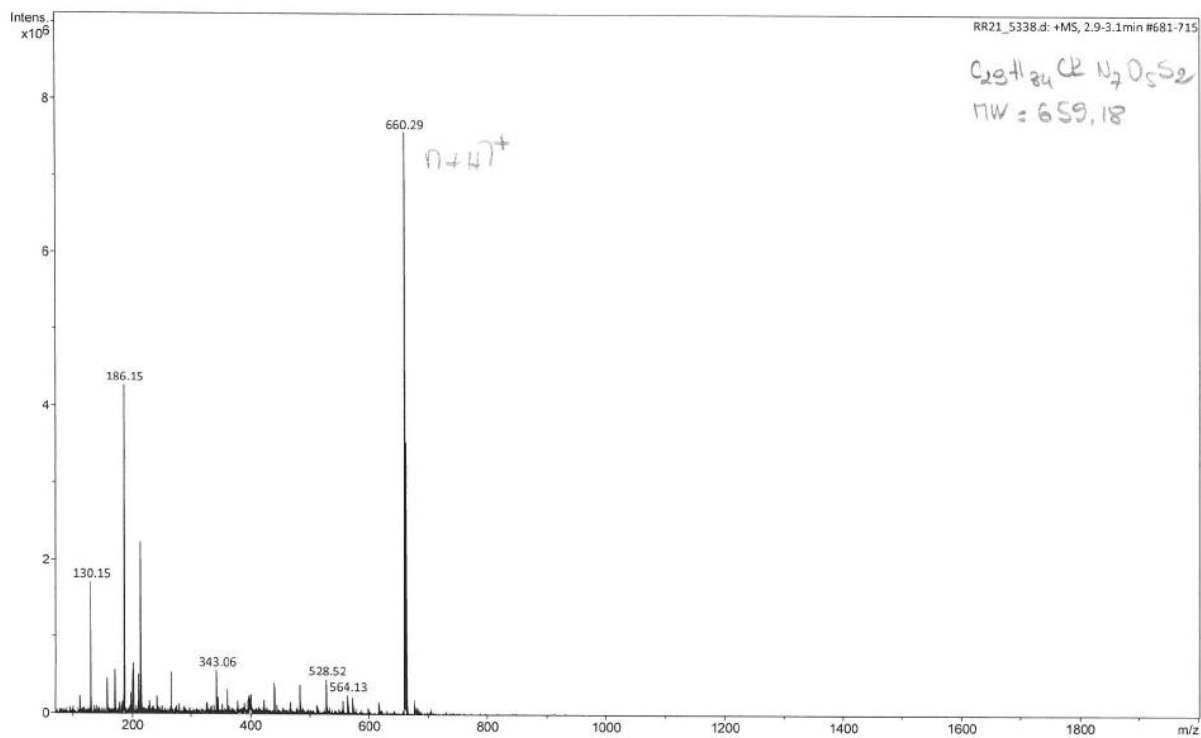



RR18 (MolPort-000-274-087)

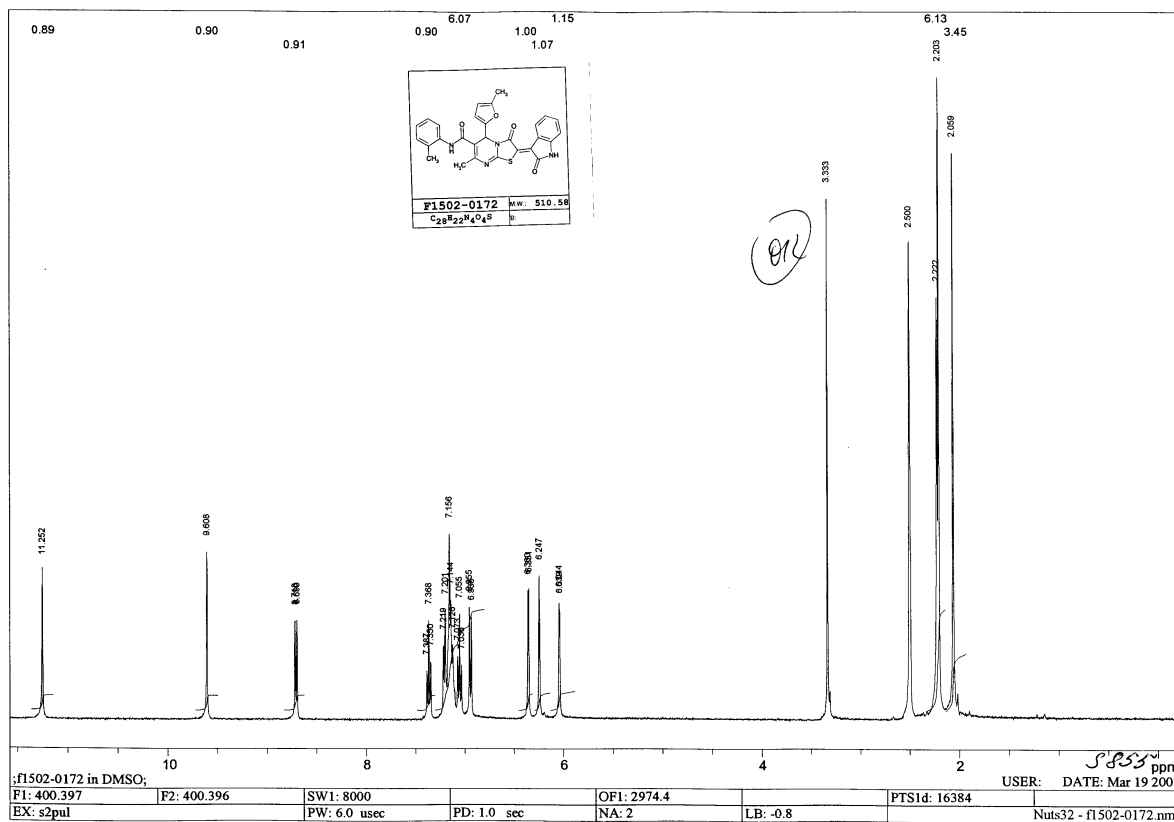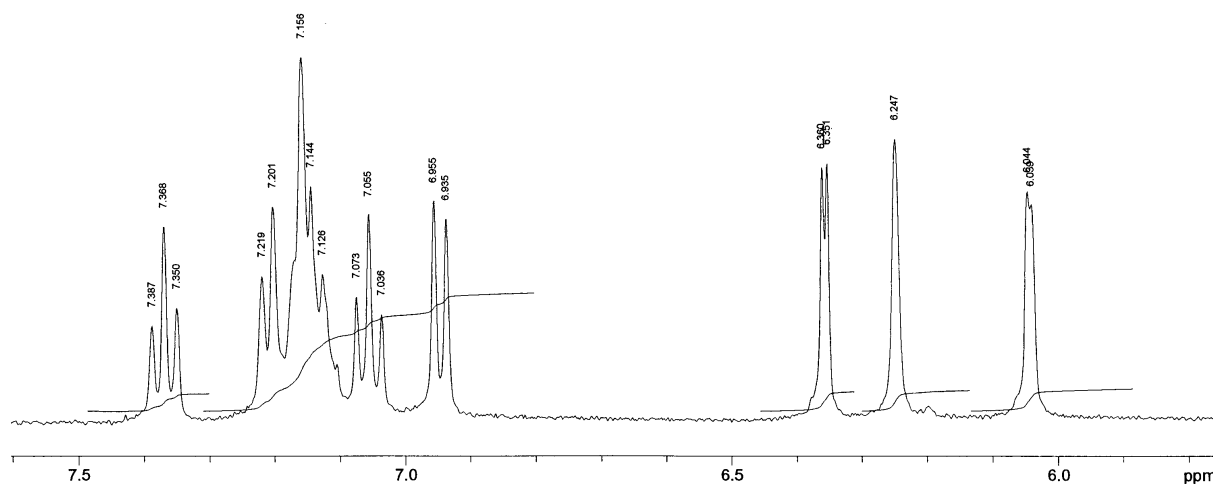

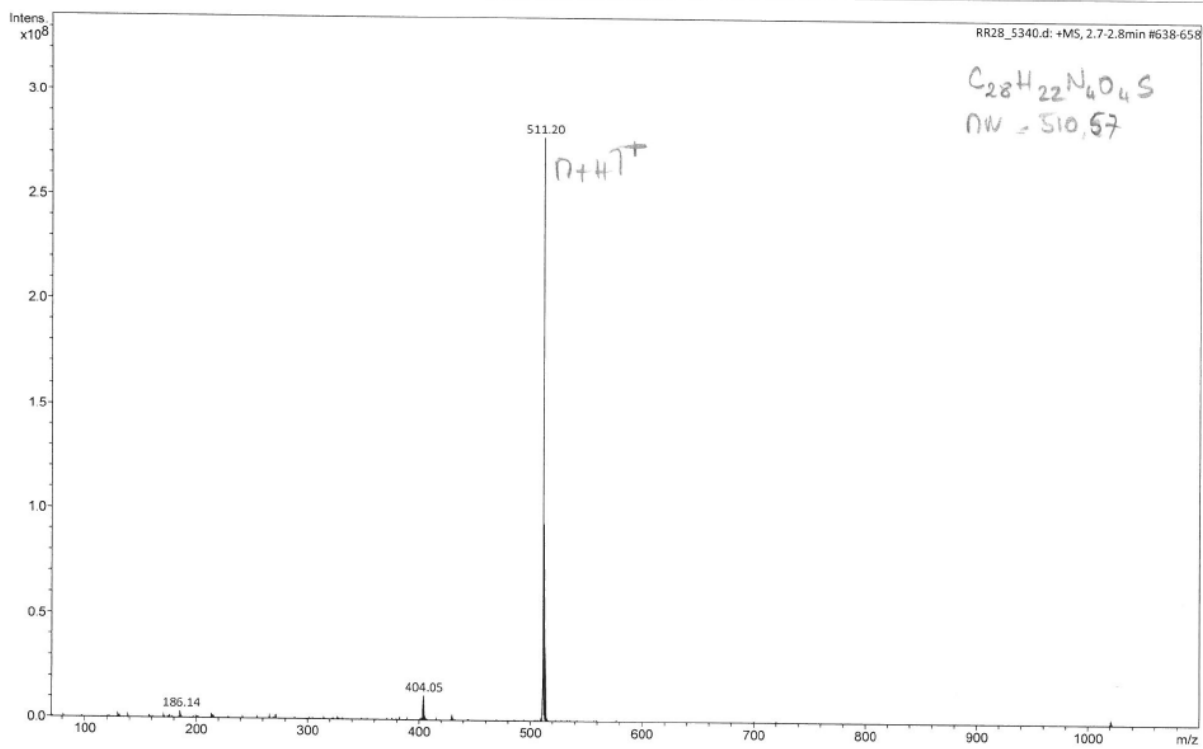

# RR20 (MolPort-000-117-304)

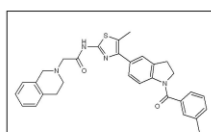

|                                                                 |                                        |
|-----------------------------------------------------------------|----------------------------------------|
| RDV 2802146                                                     | 0568789                                |
| <b>*10296138*</b>                                               |                                        |
| C <sub>31</sub> H <sub>30</sub> N <sub>4</sub> O <sub>2</sub> S | 522.67                                 |
| BAS-10296138                                                    | 18.04.2004 Solvent: DMF-d <sub>7</sub> |

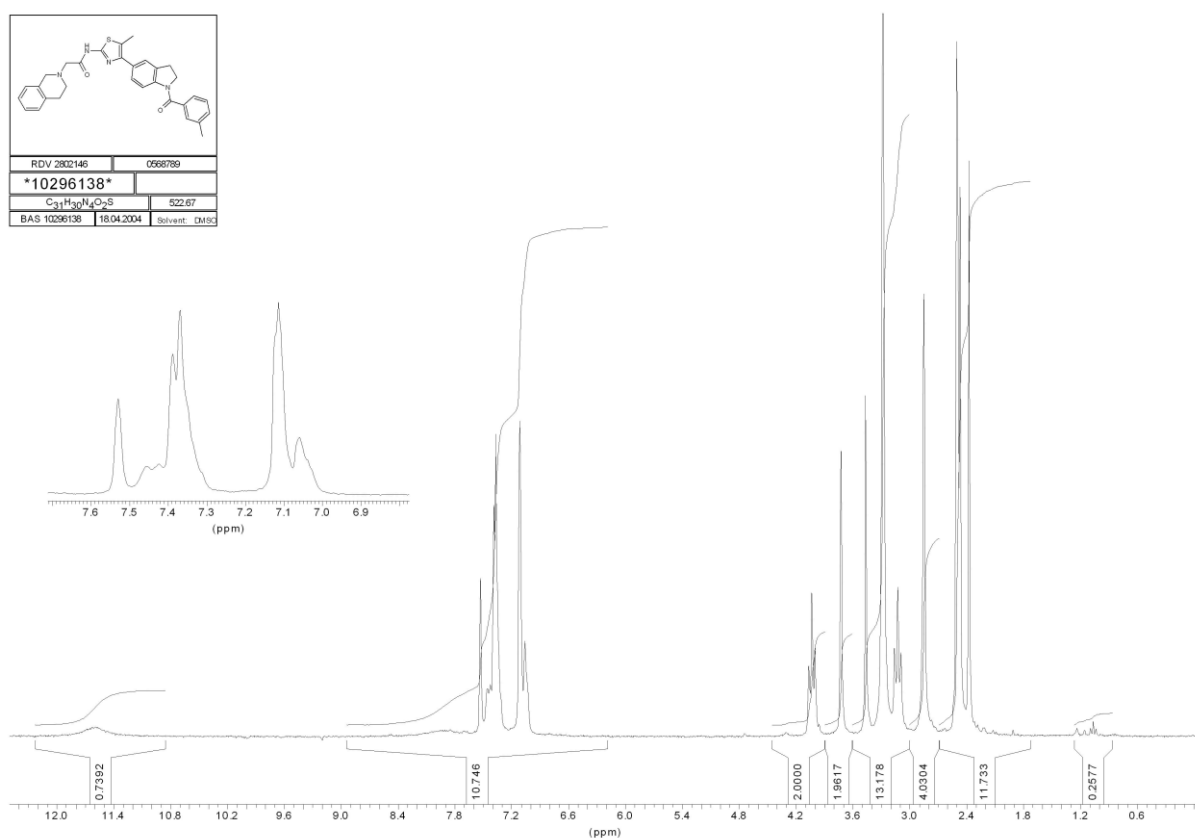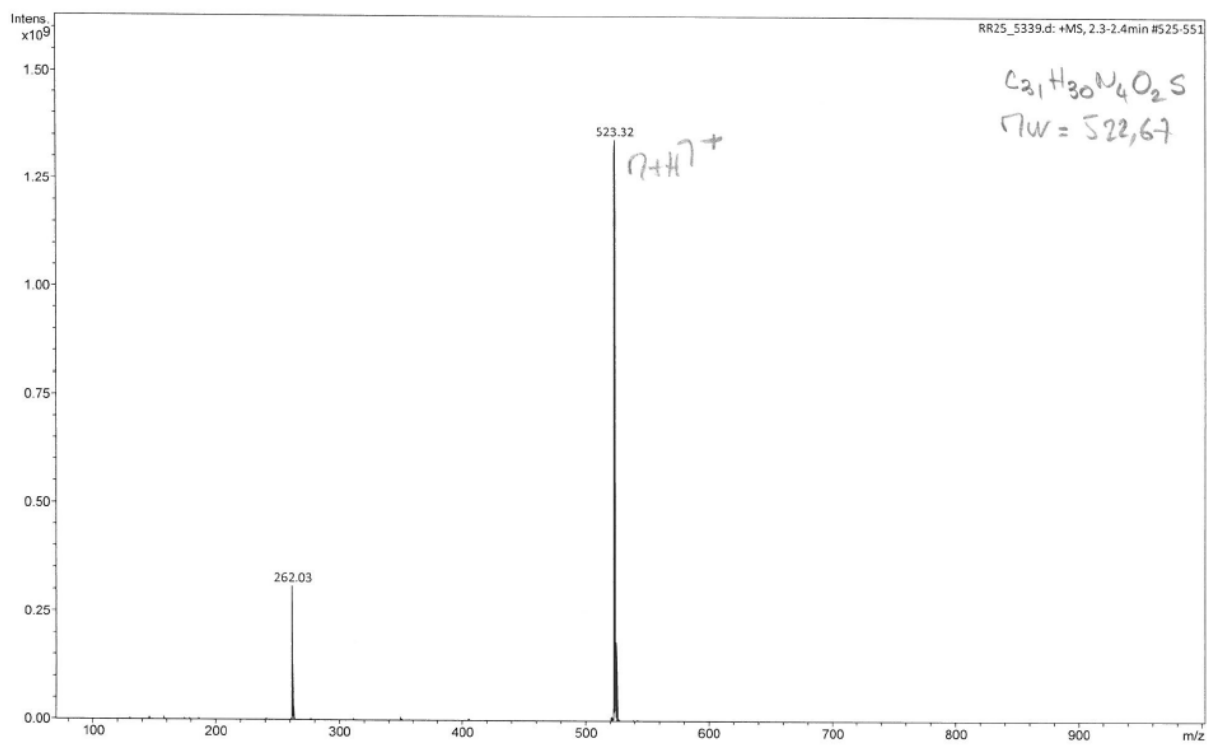

# RR21 (MolPort-000-250-727)

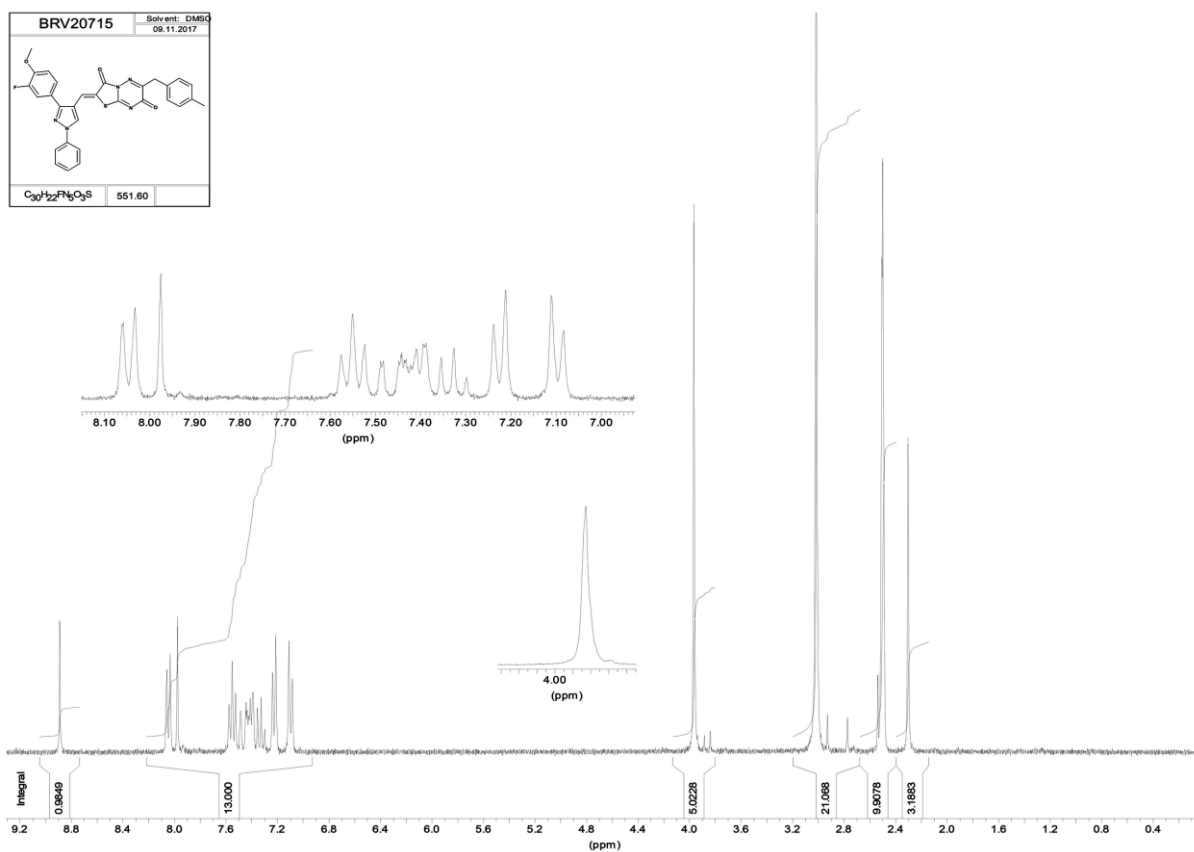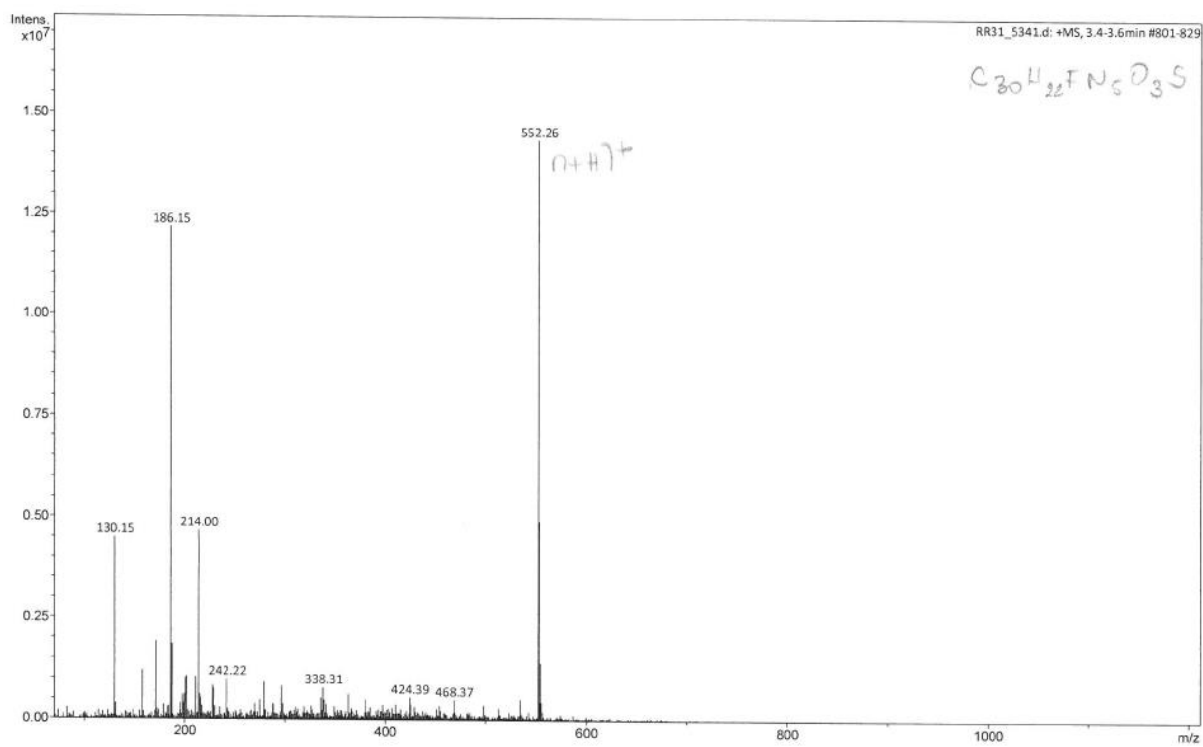

Supplement: pcbi.1005943.s006.pdf [file pcbi.1005943.s006.pdf]
